# Supplementary material for: Brief communication: Use of lightweight and low-cost steel net electrodes for electrical resistivity tomography (ERT) surveys performed on coarse-blocky surface environments
Source: Copernicus journal article supplement (doi:10.5194/egusphere-2025-405), 2025-02-19
Supplement: Supplementary file [file egusphere-2025-405-AC3-supplement.pdf]

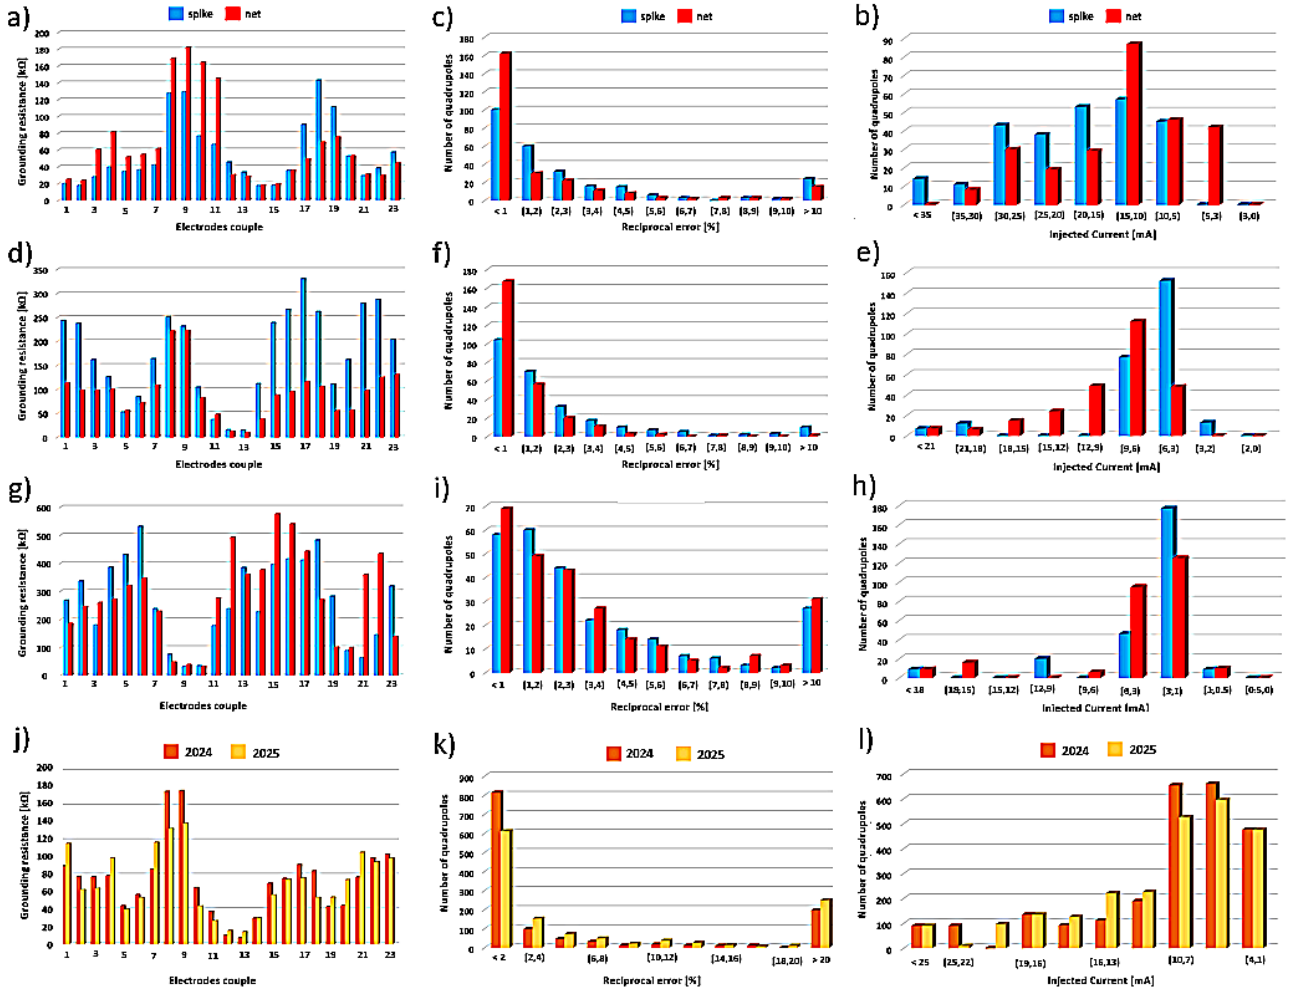

**Figure 2.** Histograms (a), (d), and (g) compare grounding resistances [kΩ] recorded at the Marocche di Drò, Sadole, and Flüela test sites, respectively, using traditional stainless-steel spike electrodes with sponges (blue) and the proposed stainless-steel net electrodes with sponge inserts (red). Panels (b), (e), and (h) show the corresponding injected electric currents [mA], while (c), (f), and (i) present the reciprocal error [%] of the quadrupoles for the same sites and electrode types. All electrodes were moistened with the same amount of saltwater and placed at comparable positions between surface boulders (see Fig. 1b–c). Panels (j), (k), and (l) illustrate the contact resistances (first 24 electrodes, as in panel a), injected currents, and reciprocal errors for datasets acquired at the Sadole site in June 2024 (orange) and June 2025 (yellow) along the permanent ERT monitoring line using the stainless-steel net electrodes.
